# Supplementary material for: Artificial intelligence for the echocardiographic assessment of valvular heart disease
Source: PubMed Central journal article supplement — Heart. 2022 Feb 10;108(20):1592–9. doi: 10.1136/heartjnl-2021-319725 (PMC9554049; doi:10.1136/heartjnl-2021-319725), 2022-02-10
Supplement: heartjnl-2021-319725supp001.pdf [file heartjnl-2021-319725supp001.pdf]

Supplementary Table 1. Commercial valve software

| Vendor     | Software                | Valves Analyzed           | Functionality                                                                                                                                                                                                                                                                                                                                                                                                                                                                                                                                                                                                                                                                                                                                                                                                                                                         |
|------------|-------------------------|---------------------------|-----------------------------------------------------------------------------------------------------------------------------------------------------------------------------------------------------------------------------------------------------------------------------------------------------------------------------------------------------------------------------------------------------------------------------------------------------------------------------------------------------------------------------------------------------------------------------------------------------------------------------------------------------------------------------------------------------------------------------------------------------------------------------------------------------------------------------------------------------------------------|
| GE-Vingmed | 4D Auto MVQ             | Mitral                    | Dynamic modelling using 3D echocardiography. Is able to perform semi-automated measurement of mitral valve annular and leaflet geometry. This software works on stored 3D images and is not capable of real time assessment.                                                                                                                                                                                                                                                                                                                                                                                                                                                                                                                                                                                                                                          |
|            | 4D Auto AVQ             | Aortic                    | This software allows automated computation of the mid-systolic dimensions of the aortic annulus (maximum and minimum diameter, perimeter, and planimetered area) in 3 steps from 3D transesophageal echocardiograms.                                                                                                                                                                                                                                                                                                                                                                                                                                                                                                                                                                                                                                                  |
|            | 4D Auto TVQ             | Tricuspid                 | Using 3D echocardiography, this software provides 15 static and dynamic measurements of the tricuspid valve using both TEE and TTE.                                                                                                                                                                                                                                                                                                                                                                                                                                                                                                                                                                                                                                                                                                                                   |
| Philips    | Mitral Valve Navigation | Mitral                    | Static modelling using 3D transesophageal echocardiography. This package measures dimensions and geometry of the mitral annulus, including valve area, volume, and tenting, to demonstrate leaflet pathology and subsequent changes after intervention.                                                                                                                                                                                                                                                                                                                                                                                                                                                                                                                                                                                                               |
|            | Aortic Valve Navigator  | Aortic                    | During publication, this was a prototype model. Is not currently commercially available.                                                                                                                                                                                                                                                                                                                                                                                                                                                                                                                                                                                                                                                                                                                                                                              |
| Siemens    | eSie, Autovalve         | Mitral, Aortic, Tricuspid | Dynamic and static modelling using 3D transesophageal echocardiography. This package allows automated detection, quantification, and modelling. Geometric analysis including annular area, diameter, height, inter-commissural distance, annular perimeter, leaflet length. Also allows for interactivity by placing valves in aortic and mitral position and simulating the effects on the surrounding structures. A total of 64 automated measurements can be performed categorized by diagnosis, intervention and surgery. For example, In the diagnosis category, some mitral valve measurements include mitral annulus diameters, perimeters, area, intertrigonal distance, valve orifice area, and intercommissural distance. This software is typically used with a specific system, Siemens ACUSON S2000 ultrasound system, and echo probe, True Volume Z6Ms. |

|                             |              |        |                                                                                                                                                                                                                                                                                            |
|-----------------------------|--------------|--------|--------------------------------------------------------------------------------------------------------------------------------------------------------------------------------------------------------------------------------------------------------------------------------------------|
| TomTec Imaging Systems GmbH | TomTec-Arena | Mitral | Static and dynamic Modelling using 3D echocardiography. This program provides geometric measurements such as annular dimension, leaflet morphology, coaptation descriptions. Advanced navigation options and flexible manual measurements in 2D and 3D allows for individualized planning. |
|-----------------------------|--------------|--------|--------------------------------------------------------------------------------------------------------------------------------------------------------------------------------------------------------------------------------------------------------------------------------------------|
